# Supplementary material
Source: MDPI journal article supplement (https://www.mdpi.com/search?q=catalysts-09-01023)
Supplement: s001 [file catalysts-09-01023-s001.pdf]

1 *Supplementary materials*

2 **Applications of microbial laccases: Patent review of the past decade (2009-2019)**

3 **Anastasia Zerva <sup>1</sup>, Stefan Simić <sup>2</sup>, Evangelos Topakas <sup>1,\*</sup> and Jasmina Nikodinovic-Runic <sup>2,\*</sup>**

4 <sup>1</sup> IndBioCat Group, Biotechnology Laboratory, School of Chemical Engineering, National Technical University of Athens, 5 Iroon Polytechniou Str., Zografou Campus, Athens  
5 15780, Greece;

6 <sup>2</sup> Institute for Molecular Genetics and Genetic Engineering, University of Belgrade; Vojvode Stepe 444a, 11000 Belgrade, Serbia

7 \* Correspondence: [jasmina.nikodinovic@imgge.bg.ac.rs](mailto:jasmina.nikodinovic@imgge.bg.ac.rs); Tel.: +381 11 397 6034 (J.N.R.); [vtopakas@chemeng.ntua.gr](mailto:vtopakas@chemeng.ntua.gr); Tel.: +30 210 772 3264 (E.T.)

8

9

Table S1. The patents cited in the main text.

| Appearance in text | Title                                                                                                     | Patent number     | Year of publication | Inventor (Applicant)                                                                                                                  | Category                                                 |
|--------------------|-----------------------------------------------------------------------------------------------------------|-------------------|---------------------|---------------------------------------------------------------------------------------------------------------------------------------|----------------------------------------------------------|
| 1                  | Freezing point depressed solid matrix compositions for melt granulation of enzymes                        | WO 2019089898 A1  | 2019                | Nathaniel T. Becker,<br>Joseph C. Mcauliffe,<br>Peyman Moslemy,<br>Jared Enwei Tan,<br>Luther White (Danisco Us Inc)<br>Wayne Ashton, | Enzyme Production,<br>Immobilization and<br>Biocatalysis |
| 2                  | Laccases and methods of use thereof at low temperature                                                    | US 20110302722 A1 | 2011                | Andreas J. Krouwer,<br>Joseph C. McAuliffe,<br>Piera M. Pericu,<br>Huaming Wang (Danisco Us Inc)                                      | Enzyme Production,<br>Immobilization and<br>Biocatalysis |
| 3                  | Laccase variants having increased expression and/or activity                                              | US 20140123404 A1 | 2014                | Huaming Wang,<br>Michael Ward<br>(Danisco Us Inc)                                                                                     | Enzyme Production,<br>Immobilization and<br>Biocatalysis |
| 4                  | Specific 7-amino-1,2,3,4-tetrahydroquinolines, method, and composition                                    | WO 2019072697 A1  | 2019                | Aziz Fadli,<br>Zhibo Liu,<br>Céline Richardson<br>(L'oreal)                                                                           | Pharma / Cosmetics /<br>Agrochemicals                    |
| 5                  | Compositions and methods for improving color deposit and durability of color in artificially colored hair | WO2019046396A1    | 2019                | Andrea Elsen,<br>Nghì Van Nguyen,<br>Jim Singer                                                                                       | Pharma / Cosmetics /<br>Agrochemicals                    |
| 6                  | Pretreatment process of jute or red ramie                                                                 | CN102086533A      | 2013                | Liu Guozhong<br>(Jiangsu Bauhinia Textile<br>Technology Co., Ltd.)                                                                    | Textiles and fibers                                      |
| 7                  | Refining processing method of fibrilia                                                                    | CN102517648A      | 2012                | Liu Guozhong Yao Jiangang, Zhang<br>Zhenyao,<br>Zhang Ximing<br>(Jiangsu Bauhinia Textile<br>Technology Co., Ltd.)                    | Textiles and fibers                                      |

---

|    |                                                                                        |              |      |                                                                                                                                                                                                                                                                                                                                                                                                        |                                                          |
|----|----------------------------------------------------------------------------------------|--------------|------|--------------------------------------------------------------------------------------------------------------------------------------------------------------------------------------------------------------------------------------------------------------------------------------------------------------------------------------------------------------------------------------------------------|----------------------------------------------------------|
| 8  | A kind of laccase chemical modification method and its application                     | CN108823177A | 2018 | Chen Yangmei,<br>Jiang Yu,<br>Wu Qitang, Chen Jiajin,<br>Qiu<br>Zhuotao, Chen Shuanna,<br>(South China Agricultural<br>University)<br>Wang Zhiwei,<br>Wu Ming,<br>Ma Haijun,<br>Huang Huanhuan,<br>Wang Shuangfei,<br>Liu Xinliang,<br>Lu Peng<br>(Guangxi University)<br>Sun Wei,<br>Chen Guang,<br>Yan Zechang,<br>Su Yujie,<br>Wang Gang,<br>Chen Huan,<br>Yu Yu<br>(Jilin Agricultural University) | Lignin removal and<br>modification                       |
| 9  | A method of true qualities mechanical pulp is prepared using laccase treatment bagasse | CN109098025A | 2018 | Chen Yangmei,<br>Jiang Yu,<br>Wu Qitang, Chen Jiajin,<br>Qiu<br>Zhuotao, Chen Shuanna,<br>(South China Agricultural<br>University)<br>Wang Zhiwei,<br>Wu Ming,<br>Ma Haijun,<br>Huang Huanhuan,<br>Wang Shuangfei,<br>Liu Xinliang,<br>Lu Peng<br>(Guangxi University)<br>Sun Wei,<br>Chen Guang,<br>Yan Zechang,<br>Su Yujie,<br>Wang Gang,<br>Chen Huan,<br>Yu Yu<br>(Jilin Agricultural University) | Lignin removal and<br>modification                       |
| 10 | A kind of myrothecium verrucaria of high yield laccase and application                 | CN109868224A | 2019 | Chen Yangmei,<br>Jiang Yu,<br>Wu Qitang, Chen Jiajin,<br>Qiu<br>Zhuotao, Chen Shuanna,<br>(South China Agricultural<br>University)<br>Wang Zhiwei,<br>Wu Ming,<br>Ma Haijun,<br>Huang Huanhuan,<br>Wang Shuangfei,<br>Liu Xinliang,<br>Lu Peng<br>(Guangxi University)<br>Sun Wei,<br>Chen Guang,<br>Yan Zechang,<br>Su Yujie,<br>Wang Gang,<br>Chen Huan,<br>Yu Yu<br>(Jilin Agricultural University) | Enzyme Production,<br>Immobilization and<br>Biocatalysis |
| 11 | The CotA laccase and its application that a kind of catalytic efficiency improves      | CN109439635A | 2019 | Guan Zhengbing,<br>Xu Kaizhong,<br>Liao Xiangru<br>(Jiangnan University)<br>Zhang Jie,<br>Zhang Jiaying,<br>Xu Hui,                                                                                                                                                                                                                                                                                    | Enzyme Production,<br>Immobilization and<br>Biocatalysis |
| 12 | A method of enzyme is recycled in catalysis reaction                                   | CN109652386A | 2019 | Zhang Jie,<br>Zhang Jiaying,<br>Xu Hui,                                                                                                                                                                                                                                                                                                                                                                | Enzyme Production,<br>Immobilization and<br>Biocatalysis |

---

---

|    |                                                                                                                     |                 |      |                                                                                                                  |                                                          |
|----|---------------------------------------------------------------------------------------------------------------------|-----------------|------|------------------------------------------------------------------------------------------------------------------|----------------------------------------------------------|
|    |                                                                                                                     |                 |      | Li Fukun,<br>Cheng Zhongqi<br>(Chongqing Technology and<br>Business University)                                  |                                                          |
| 13 | Enzyme-metal hybrid nanoflowers<br>and its application in repeated<br>batch decolorization of dyes                  | KR 20190033780A | 2019 | Sanjay K.S. Patel, Seong Hun Yeong,<br>Jinglin Li, Jung Kul Lee (Univ<br>Konkuk Ind Coop Corp)                   | Enzyme Production,<br>Immobilization and<br>Biocatalysis |
| 14 | Preparation method of poly(methyl<br>methacrylate) coated carboxyl<br>carbon nanotube immobilized<br>laccase        | CN107988196A    | 2018 | Zhang Mei,<br>Zhang Yimei,<br>Lai Wei,<br>Wu Panpan,<br>Wang Liqun<br>(North China Electric Power<br>University) | Enzyme Production,<br>Immobilization and<br>Biocatalysis |
| 15 | Enzyme-porous carrier composite<br>and manufacturing method thereof                                                 | KR 20180041065A | 2018 | Jung Bae Kim, Hansol Kim (Korea<br>University Industry- Academic<br>Coop Fondation)                              | Enzyme Production,<br>Immobilization and<br>Biocatalysis |
| 16 | Method for biomimetic synthesis of<br>nano zirconium dioxide<br>immobilized laccase                                 | CN107858344A    | 2018 | Wang Meiyin,<br>Wu Huimin<br>(Fuzhou University)                                                                 | Enzyme Production,<br>Immobilization and<br>Biocatalysis |
| 17 | Method for preparing bacterial<br>cellulose adsorbing enzyme and<br>product thereof                                 | TWI622646B      | 2018 | Sheng-Chi Wu,<br>Sian-Ming Wu,<br>Feng-Min Su,<br>(Fooyin University)                                            | Enzyme Production,<br>Immobilization and<br>Biocatalysis |
| 18 | Modified diatomite carried<br>immobilized spore laccase as well<br>as preparation method and<br>application thereof | CN105063008A    | 2018 | Guan Zhengbing,<br>Zhou Wen,<br>Liao Xiangru,<br>Cai Yujie,<br>Chen Kang<br>(Jiangnan University)                | Enzyme Production,<br>Immobilization and<br>Biocatalysis |

---

---

|    |                                                                                                       |                 |      |                                                                                                                                                                   |                                                    |
|----|-------------------------------------------------------------------------------------------------------|-----------------|------|-------------------------------------------------------------------------------------------------------------------------------------------------------------------|----------------------------------------------------|
| 19 | New process for preparing biphenyl compounds                                                          | WO2016050988A1  | 2016 | Stéphane Grelier,<br>Henri Cramail,<br>Audrey Llevot,<br>Stéphane Carlotti,<br>Etienne Grau<br>(Université De Bordeaux, Institut Polytechnique De Bordeaux, CNRS) | Enzyme Production, Immobilization and Biocatalysis |
| 20 | Method for preparing hyaluronic acid substitute through oxidizing chitosan by laccase-TEMPO system    | CN104745662A    | 2015 | Qi Jicheng,<br>Yin Yunbei (Tianjin University of Science and Technology)                                                                                          | Pharma / Cosmetics / Agrochemicals                 |
| 21 | A kind of cotton fabrics and its pre-treating method                                                  | CN109722908A    | 2019 | Liu Ying; Liu Guohong; Wang Guan; Chen Jie; Zhou Ying (Wuhan Sunhy Biological Co. Ltd)                                                                            | Textiles and fibers                                |
| 22 | Low-temperature oxygen bleaching activator for pure cotton fabric                                     | CN108642854A    | 2018 | Sun Yi,<br>Xu Yu,<br>Zhang Wei<br>(Sun Yi)                                                                                                                        | Textiles and fibers                                |
| 23 | Compositions and methods for biodegrading plastic                                                     | WO2014167562A1  | 2014 | Alex Sivan,<br>Amir Aharoni,<br>(B.G Negev Technologies Ltd.)                                                                                                     | Bioremediation and Detoxification                  |
| 24 | Mesoporous catalysts of magnetic nanoparticles and free-radical-producing enzymes, and methods of use | WO2012122437A2  | 2012 | Stephane C. Corgie,<br>Patarawan Kahawong,<br>Emmanuel Giannelis,<br>Larry P. Walker<br>(Cornell University)                                                      | Bioremediation and Detoxification                  |
| 25 | Detergents with improved detergent power, containing at least one laccase                             | US20180127687A1 | 2018 | Nina Mußmann,<br>Timothy O'Connell,<br>Daniela Herbst,<br>Inken Prieser,<br>Ralf G. Berger,<br>Diana Linke,<br>Christoph Behrens                                  | Detergents                                         |

---

|    |                                                                                                                                                                   |                 |      |                                                                                                                                                          |                           |
|----|-------------------------------------------------------------------------------------------------------------------------------------------------------------------|-----------------|------|----------------------------------------------------------------------------------------------------------------------------------------------------------|---------------------------|
| 26 | Detergent containing at least one laccase as a dye-transfer inhibitor                                                                                             | US20170267947A1 | 2017 | (Henkel AG and Co KGaA)<br>Nina Mußmann,<br>Timothy O'Connell,<br>Thomas Weber,<br>Mareile Job,<br>Hendrik Hellmuth,<br>Michael Strotz,<br>Inken Prueser | Detergents                |
| 27 | Preparation method and application of two-dimensional nano rare earth borate laccase sensor                                                                       | CN103499625A    | 2015 | (Henkel AG and Co KGaA)<br>Hu Ping,<br>Zhou Xinlin,<br>Wu Qingsheng<br>(Tongji University)                                                               | Sensors and biofuel cells |
| 28 | A kind of preparation of the electrochemical sensor shown with instant visualization colorimetric                                                                 | CN110068570A    | 2019 | Yu Jinghua,<br>Sun Jianli,<br>Li Li (Ji Nan University)                                                                                                  | Sensors and biofuel cells |
| 29 | Method for preparing protein/pectin/chitosan composite film by using thermostable recombinant bacterial laccase, and product thereof, and applications of product | CN109111584A    | 2019 | Zhang Chong, Bu Guojian, Zhang Xiaojian<br>(Nanjing Agricultural University, Taixing Dongsheng Bio Tech Co. Ltd.)                                        | Polymers and biopolymers  |
| 30 | A kind of preparation method of automobile instrument panel sealing element                                                                                       | CN109096736A    | 2018 | Liu Shiming (Quanjiao Xiangrui Plastic Co., Ltd.)                                                                                                        | Polymers and biopolymers  |

---

|    |                                                                        |              |      |                                                                    |                     |
|----|------------------------------------------------------------------------|--------------|------|--------------------------------------------------------------------|---------------------|
| 31 | Lacquer for paper base lacquer painting and preparation method thereof | CN 109627825 | 2019 | Meng Meilin, Meng Yucun, Sheng Rong (Anhui Polytechnic University) | Paint and coatings  |
| 32 | Preparation method of thermal-insulation coating for exterior wall     | CN 109735175 | 2019 | Lu Na (Changzhou City Richen Decoration Materials Co., Ltd.)       | Paints and coatings |

---

11 **Table S2.** Comparison of recent laccase-related journal publications and patents across categories.

| Scientific publications <sup>a</sup> |                      | Patents last decade <sup>b</sup> |                       |
|--------------------------------------|----------------------|----------------------------------|-----------------------|
| Category                             | Number of papers (%) | Category                         | Number of patents (%) |
| Bioremediation                       | 29                   | Lignin removal and modification  | 20                    |
| Biofuel cells/Biosensors             | 22                   | Biochemistry and Biocatalysis    | 15                    |
| Textile                              | 20                   | Pharma/ Cosmetics/ Agrochemicals | 13                    |
| Pulp and paper                       | 11                   | Textiles and fibers              | 11                    |
| Food                                 | 10                   | Bioremediation                   | 10                    |
| Organic synthesis                    | 4                    | Food and beverages               | 8                     |
| Biofuels                             | 2                    | Detergents                       | 8                     |
| Fiberboards                          | 0.7                  | Biofuel cells/ Biosensors        | 7                     |
| Cosmetics                            | 0.7                  | Plastics and biopolymers         | 4                     |
| Paints                               | 0.3                  | Paints and Coatings              | 2                     |
|                                      |                      | Miscellaneous                    | 2                     |

12 <sup>a</sup> Mate and Alcalde, [57]. <sup>b</sup> SciFinder database (2008-2019).

13

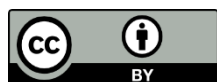

© 2019 by the authors. Submitted for possible open access publication under the terms and conditions of the Creative Commons Attribution (CC BY) license (<http://creativecommons.org/licenses/by/4.0/>).

14
